# Supplementary material for: Effect of Dietary Laminaria digitata with Carbohydrases on Broiler Production Performance and Meat Quality, Lipid Profile, and Mineral Composition
Source: MDPI journal article supplement (doi:10.3390/ani12081007), 2022-04-13
Supplement: s1 [file s1]

**Table S1.** Loadings for the first two principal components in the thigh muscle.

| Variables            | Factor 1 | Factor 2 |
|----------------------|----------|----------|
| 10:0                 | 0.01     | -0.28    |
| 12:0                 | 0.46     | 0.45     |
| 14:0                 | 0.85     | 0.31     |
| 14:1c9               | 0.77     | 0.03     |
| 15:0                 | -0.04    | 0.31     |
| 16:0                 | 0.61     | 0.67     |
| 16:1c7               | 0.64     | 0.27     |
| 16:1c9               | 0.79     | 0.14     |
| 17:0                 | -0.44    | 0.49     |
| 17:1c9               | 0.59     | 0.17     |
| 18:0                 | -0.58    | 0.66     |
| 18:1c9               | 0.62     | 0.56     |
| 18:1c11              | -0.65    | 0.59     |
| 18:2n6               | -0.24    | -0.93    |
| 18:3n6               | 0.00     | -0.61    |
| 18:2t9t12            | 0.66     | -0.33    |
| 18:3n3               | 0.61     | -0.68    |
| 18:4n3               | -0.42    | 0.07     |
| 20:0                 | -0.33    | 0.46     |
| 20:1c11              | 0.30     | 0.60     |
| 20:2n6               | -0.48    | -0.15    |
| 20:3n6               | 0.35     | -0.43    |
| 20:4n6               | -0.84    | -0.17    |
| 20:3n3               | 0.04     | 0.39     |
| 20:5n3               | -0.65    | -0.47    |
| 22:0                 | -0.54    | 0.51     |
| 22:1n-9              | -0.17    | 0.69     |
| 22:2n-6              | 0.14     | -0.36    |
| 22:5n-3              | -0.81    | -0.31    |
| 22:6n-3              | -0.84    | 0.34     |
| Total lipids         | 0.81     | -0.13    |
| Cholesterol          | 0.14     | 0.20     |
| $\alpha$ -Tocopherol | 0.16     | 0.02     |
| $\gamma$ -Tocopherol | 0.30     | -0.01    |
| Chlorophyll a        | -0.61    | -0.10    |
| Chlorophyll b        | -0.51    | -0.05    |
| Carotenoids          | -0.47    | 0.06     |
| Sodium               | 0.18     | -0.38    |
| Potassium            | 0.08     | 0.06     |
| Calcium              | 0.17     | -0.12    |
| Magnesium            | -0.01    | 0.29     |
| Phosphorous          | -0.08    | 0.16     |
| Sulphur              | -0.06    | -0.02    |

|           |       |       |
|-----------|-------|-------|
| Copper    | 0.13  | 0.04  |
| Zinc      | 0.11  | -0.07 |
| Manganese | -0.03 | -0.24 |
| Iron      | -0.09 | 0.09  |
